# Supplementary material for: Evaluation of Pharmacists’ Preferences and Barriers to Access Continuing Education: A Cross-Sectional Study in Lebanon
Source: PubMed Central journal article supplement (PMC9630953; doi:10.1177/01632787221126500), 2022-09-07
Supplement: sj-pdf-1-ehp-10.1177_01632787221126500.pdf [file sj-pdf-1-ehp-10.1177_01632787221126500.pdf]

## Appendix

### Supplementary Tables

Table 1: Distribution of the pharmacists between different governorates and according to their sex (Comparison between

| Governorate   | Frequency in the study sample | Percentage (%) | Ministry statistics in 2016 | Percentage (%) |
|---------------|-------------------------------|----------------|-----------------------------|----------------|
|               | Beirut                        | 39             | 27.5                        | 1537           |
| Mount Lebanon | 69                            | 48.6           | 4297                        | 50.7           |
| North         | 13                            | 9.2            | 1011                        | 11.9           |
| South         | 11                            | 7.7            | 746                         | 8.8            |
| Beqaa         | 10                            | 7              | 876                         | 10.4           |
| <b>Sex</b>    |                               |                |                             |                |
| Male          | 53                            | 37.3           | 3337                        | 37.7           |
| Female        | 89                            | 62.7           | 5518                        | 62.3           |

of public health data in 2016).

Table 2. General and job characteristics of the study participants. Lebanon 2017

|                                |                           | Frequency (%) |
|--------------------------------|---------------------------|---------------|
| <b>Age (Years)</b>             | Less than 25              | 80 (56.3%)    |
|                                | 25-35                     | 30 (21.1%)    |
|                                | 35-45                     | 21 (14.8%)    |
|                                | More than 45              | 11 (7.8%)     |
| <b>Type of certificate</b>     | Pharmacy                  | 60 (42.3%)    |
|                                | PharmD                    | 32 (22.5%)    |
|                                | Master                    | 39 (27.5%)    |
|                                | PhD                       | 11 (7.7%)     |
| <b>Source of certificate</b>   | Public University         | 85 (62.5%)    |
|                                | Private University        | 35 (25.7%)    |
|                                | Outside Lebanon           | 16 (11.8%)    |
| <b>Position of Pharmacists</b> | Manager in a pharmacy     | 29 (21.3%)    |
|                                | Manager in a company      | 20 (14.7%)    |
|                                | Entry-level in a pharmacy | 60 (44.1%)    |
|                                | Entry-level in a company  | 27 (19.9%)    |
| <b>Years of Practice</b>       | Less than 5               | 97 (68.3%)    |
|                                | 5-9                       | 25 (17.6%)    |
|                                | 10-14                     | 5 (3.5%)      |
|                                | >15                       | 15 (10.6%)    |

## Questionnaire in English

نرجو المشاركة في الإحصاء بالرد على الأسئلة المطروحة مع تعهدنا على عدم إستعمال المعلومات المعطاة إلا بإطار الدراسة العلمية البحتة التي نجريها

### **Part 1: Demographic Data**

| Demographic Data      |                                                                                                                                                                     |
|-----------------------|---------------------------------------------------------------------------------------------------------------------------------------------------------------------|
| Gender                | <input type="checkbox"/> Male <input type="checkbox"/> Female                                                                                                       |
| Age                   | -----                                                                                                                                                               |
| District/City of work | <input type="checkbox"/> Beirut <input type="checkbox"/> Bekaa <input type="checkbox"/> South <input type="checkbox"/> North <input type="checkbox"/> Mount Lebanon |
| Type of certificate   | <input type="checkbox"/> Pharmacy <input type="checkbox"/> PharmD <input type="checkbox"/> Masters <input type="checkbox"/> PhD                                     |
| Source of certificate | <input type="checkbox"/> LU <input type="checkbox"/> Private <input type="checkbox"/> Outside Lebanon                                                               |
| Period of practice    | -----                                                                                                                                                               |

### **Part 2: Data on Perception regarding the effectiveness of CPD**

What CPD have you done in the past 12 months? Please tick all that apply

|                                  |  |
|----------------------------------|--|
| CD/DVD learning                  |  |
| Conference attendance            |  |
| Drug companies materials/ events |  |
| E Learning module                |  |
| Online conference                |  |

In what ways was the CPD successful/ worthwhile/ inspirational, or otherwise?

|                           | <b>Strongly agree</b> | <b>Agree</b> | <b>Neutral/Don't know</b> | <b>Disagree</b> | <b>Strongly Disagree</b> |
|---------------------------|-----------------------|--------------|---------------------------|-----------------|--------------------------|
| Change in attitude        |                       |              |                           |                 |                          |
| Change in practice        |                       |              |                           |                 |                          |
| Improved practical skills |                       |              |                           |                 |                          |
| Knowledge acquisition     |                       |              |                           |                 |                          |
| Learner satisfaction      |                       |              |                           |                 |                          |
| Patient outcome           |                       |              |                           |                 |                          |

I consider CPD to be:

|                                   | <b>Strongly agree</b> | <b>Agree</b> | <b>Neutral/Don't know</b> | <b>Disagree</b> | <b>Strongly Disagree</b> |
|-----------------------------------|-----------------------|--------------|---------------------------|-----------------|--------------------------|
| A chore                           |                       |              |                           |                 |                          |
| Bureaucratic                      |                       |              |                           |                 |                          |
| Enjoyable                         |                       |              |                           |                 |                          |
| Natural part of professional life |                       |              |                           |                 |                          |
| Necessary for patient safety      |                       |              |                           |                 |                          |
| Necessary for career progression  |                       |              |                           |                 |                          |
| Rewarding                         |                       |              |                           |                 |                          |
| Threatening                       |                       |              |                           |                 |                          |
| Unnecessary                       |                       |              |                           |                 |                          |

Who should be responsible for the quality of CPD provision? Tick all that apply

|                         |  |
|-------------------------|--|
| Colleges/Faculties      |  |
| Deaneries               |  |
| Local providers         |  |
| Specialist societies    |  |
| Other (Please specify): |  |

Who should decide on the CPD curriculum?

|                        |  |
|------------------------|--|
| Colleges               |  |
| Employers              |  |
| Governments            |  |
| Patients               |  |
| Self-directed          |  |
| Other (Please specify) |  |

### **Part 3: Data on Self-learning and continuous education**

How do you learn best? (Tick all that apply)

|                                 |  |
|---------------------------------|--|
| Day-to-day workplace experience |  |
| Group work                      |  |
| Lecture                         |  |
| Online courses                  |  |
| Problem solving                 |  |
| Reading privately               |  |
| Talking to colleagues           |  |
| Tonto (teaching one to one)     |  |
| Workshop                        |  |

What are your barriers to CPD learning? Tick all that apply

|                             |  |
|-----------------------------|--|
| Availability of study leave |  |
| Cost                        |  |
| External demands            |  |
| Motivation                  |  |
| Past negative experiences   |  |
| Work-life balance           |  |

What best contributes to your CPD?

|                      |  |
|----------------------|--|
| College conference   |  |
| OPL learning program |  |
| Drug companies       |  |
| E-Learning           |  |
| Local provision      |  |

Do you think that the continuous education program provided by the OPL has achieved its goals?

- Yes  No

Do the CPD programs you have done match your needs in learning?

- Yes  No

Rank your satisfaction regarding CPD programs done: (over 10)

-----

Thank you
